# Supplementary material for: Application of a differential technique in laser-induced fluorimetry/pulsed LED-fluorimetry: simple and reliable analysis of uranium raw materials in the nuclear fuel cycle – a mini-review
Source: Royal Society of Chemistry journal article supplement (doi:10.1039/d3va00134b), 2023-01-01
Supplement: d3va00134b1.pdf [file d3va00134b1.pdf]

**Proof Id: d3va00134b , Journal: Environmental Science : Advances**

**Title: Application of a differential technique in laser-induced fluorimetry/pulsed LED-fluorimetry: simple and reliable analysis of uranium raw materials in the nuclear fuel cycle – a mini-review**

**Correction in Proof:**

Q1. Yes

Q2. Yes

Q3.. Graphical abstract text (250 characters):

Application of differential technique is based on the comparison of the fluorescence of the standard with a sample of similar but unknown concentration on the same sample weight basis, by the use of  $\text{H}_3\text{PO}_4\text{--NH}_4\text{H}_2\text{PO}_4$  as a fluorescence-enhancing reagent.

Q4.OK

Q5. At line 20, The recommended primary standard is a  $1\text{mg ml}^{-1}$  (1000 ppm U), add 1000 ppm U

Q6.Fig1 and 3 –OK , again attaching copies of fig 1 and 3

Q7. Position of table 2, **is not correct. It will be better at page 7.**

Q8. OK

Q9.Citation of fig 2 is –OK

Q 10. Is OK.

Q11. Ref 38, replace with: Borosil Catalogue, Glass Works Ltd, Mumbai, pp. 37- 38, 1999-2000. <https://www.borosil.com>

Q12. Ref 39: replace with: Riviera Catalogue-cum-price list, Riviera Glass Pvt. Ltd.,Mumbai,1999-2000, pp.30-34.  
[https:// www.rivieraglass.co.in](https://www.rivieraglass.co.in)

Q13.Ref 40, Replace with: Ref 55, Eppendorf Pipettes,

<https://www.pipettes.com>

Q14.Ref 42 updated as, replace with: M. Krishnakumar, Johnson George and A. A. Patwardhan,

J Radioanal Nucl Chem, **2023** , 332,1795-1804.

<https://doi.org/10.1007/s10967-023-08897-2>

Q15.Ref 54, added year,2016, replace with :

A.K Jain, A.Pandey, K. Bahuguna, and M.Kumar, Decomposition of columbite tantalite minerals by various fluxes for simple and direct determination of uranium using differential technique in LED induced fluorimeter, Published in proceedings of International Symposium on ‘Emerging Trends in Analytical Chemistry (ETAC-2016)’, pp. 25-27, **2016**.

Q16. Ref 55, year added 2016, Replace with:

P. Chakraborty, A.Pandey, A.K. Jain, S. Prakash and M.Kumar, A simple, rapid and accurate determination of uranium in refractory minerals like zircon, garnet, monazite using LED based fluorimetry”, Published in Proceedings of International Symposium on ‘Emerging Trends in Analytical Chemistry (ETAC-2016), pp. 39-41, **2016**.

Additional Corrections:

1. Line 25, Rathore <sup>21</sup> is correct. Replace reference cited 22 with 21.
2. Line 35, -- method of least square<sup>35</sup>, 35 cited reference is correct. Replace 30 with 35
3. Following is the correction suggested in the biography of V.Balaram:  
with ~7250 citations (h-index 43 & i10-index 139) to be replaced  
with correct citations: 7355 citations (h-index 44 & i 10-index 139
